# Supplementary material
Source: PubMed Central journal article supplement (PMC4762514)
Supplement: 10.1074_M115.052381_mcp.M115.052381-1.pdf [file 10.1074_M115.052381_mcp.M115.052381-1.pdf]

## SUPPLEMENTAL DATA

# **Integration of metabolomics and transcriptomics reveals major metabolic pathways and potential biomarker involved in prostate cancer**

Shancheng Ren<sup>1\*</sup>, Yaping Shao<sup>2\*</sup>, Xinjie Zhao<sup>2</sup>, Christopher S. Hong<sup>3</sup>, Fubo Wang<sup>1</sup>, Xin Lu<sup>2</sup>, Jia Li<sup>2</sup>, Guozhu Ye<sup>2</sup>, Min Yan<sup>2</sup>, Zhengping Zhuang<sup>3</sup>, Chuanliang Xu<sup>1</sup>, Guowang Xu<sup>2\*</sup>, Yinghao Sun<sup>1\*</sup>

<sup>1</sup> Department of Urology, Shanghai Changhai Hospital, Second Military Medical University, Shanghai, China

<sup>2</sup> Key Laboratory of Separation Science for Analytical Chemistry, Dalian Institute of Chemical Physics, Chinese Academy of Sciences, 116023 Dalian, China.

<sup>3</sup> Surgical Neurology Branch, National Institute of Neurological Disorders and Stroke, National Institutes of Health, Bethesda, MD, USA.

\*: equal contribution.

\*: To whom correspondence should be addressed.

Guowang Xu: Tel/Fax: +86-411-84379530. xugw@dicp.ac.cn.

Yinghao Sun: Tel/Fax: +86-021-65566429. sunyh@medmail.com.cn

**Table S1. Preparation of 30 mL methanol with isotope standards.**

| Isotope standard                 | Stock concentration<br>(mg/ml) | Volume of stock solution<br>( $\mu$ L) | Final concentration<br>( $\mu$ g/mL) |
|----------------------------------|--------------------------------|----------------------------------------|--------------------------------------|
| L-leucine-5,5,5-d3               | 0.267                          | 37.5                                   | 0.333                                |
| L-phenyl-d5-alanine              | 1.00                           | 5.00                                   | 0.167                                |
| L-tryptophan-d5                  | 0.500                          | 10.0                                   | 0.167                                |
| Acetyl-d3-L-carnitine            | 0.0114                         | 132                                    | 0.0500                               |
| Decanoyl-d3-carnitine            | 0.00208                        | 192                                    | 0.0133                               |
| Palmitoyl-d3-carnitine           | 0.0234                         | 21.4                                   | 0.0167                               |
| Palmitic acid-16,16,16-d3        | 1.00                           | 15.0                                   | 0.500                                |
| Stearic acid-18,18,18-d3         | 0.3330                         | 45.0                                   | 0.500                                |
| Cholic acid-2,2,4,4-d4           | 0.0125                         | 80.0                                   | 0.0333                               |
| Chenodeoxycholic acid-2,2,4,4-d4 | 0.0125                         | 16.0                                   | 0.00667                              |
| LysoPC(19:0)                     | 1.000                          | 20.0                                   | 0.667                                |

**Table S2. Differential metabolites in discovery cohorts.**

| Metabolites name          | ESI mode | m/z    | t <sub>R</sub> /min | RSD in QC | PCT/ANT ratio | p value | Metabolic Pathway                                                                                       |
|---------------------------|----------|--------|---------------------|-----------|---------------|---------|---------------------------------------------------------------------------------------------------------|
| 5-methylthioadenosine     | ESI+     | 298.09 | 2.25                | 4.35%     | 2.2           | 0.0032  | Cysteine and methionine metabolism                                                                      |
| Adenosine                 | ESI+     | 268.10 | 0.86                | 18.6%     | 0.6           | 0.0019  | Purine metabolism                                                                                       |
| Alanyl-glycine            | ESI+     | 147.07 | 0.72                | 3.10%     | 1.5           | 0.0422  |                                                                                                         |
| Alanyl-leucine            | ESI+     | 203.13 | 0.79                | 2.55%     | 0.7           | 0.0080  |                                                                                                         |
| Bilirubin                 | ESI+     | 585.26 | 18.0                | 2.62%     | 0.5           | 0.0004  | Porphyrin and chlorophyll metabolism                                                                    |
| Biliverdine               | ESI+     | 584.26 | 18.0                | 16.8%     | 0.4           | 0.0004  | Porphyrin and chlorophyll metabolism                                                                    |
| Choline                   | ESI+     | 104.10 | 0.71                | 4.71%     | 1.3           | 0.0149  | Glycerophospholipid metabolism;<br>Glycine, serine and threonine metabolism                             |
| Choline glycerophosphate  | ESI+     | 258.11 | 0.72                | 3.04%     | 4.5           | 0.0009  | Glycerophospholipid metabolism;<br>Ether lipid metabolism                                               |
| CDP-choline               | ESI+     | 489.11 | 0.73                | 7.09%     | 2.6           | 0.0002  | Glycerophospholipid metabolism                                                                          |
| GlcN-6-P                  | ESI+     | 260.04 | 0.73                | 2.92%     | 1.9           | 0.0016  | Amino sugar and nucleotide sugar metabolism                                                             |
| Glycated valine           | ESI+     | 296.06 | 0.71                | 3.72%     | 4.2           | 0.0004  |                                                                                                         |
| Glycyl-tyrosine           | ESI+     | 239.10 | 0.86                | 5.26%     | 0.7           | 0.0058  |                                                                                                         |
| Homoserine                | ESI+     | 120.06 | 0.73                | 5.65%     | 1.3           | 0.0094  | Cysteine and methionine metabolism;<br>Lysine biosynthesis;<br>Glycine, serine and threonine metabolism |
| L-homoserine lactone      | ESI+     | 102.05 | 0.72                | 3.97%     | 1.4           | 0.0005  | Cysteine and methionine metabolism;<br>Lysine biosynthesis;<br>Glycine, serine and threonine metabolism |
| GlcNAc                    | ESI+     | 222.09 | 0.76                | 3.49%     | 2.5           | <0.0001 | Amino sugar and nucleotide sugar metabolism                                                             |
| N-Acetyl-L-methionine     | ESI+     | 192.06 | 2.91                | 2.53%     | 0.6           | 0.0128  |                                                                                                         |
| NMN                       | ESI+     | 335.06 | 0.74                | 7.44%     | 2.2           | 0.0005  | Nicotinate and nicotinamide metabolism                                                                  |
| 2-Aminoadipic acid        | ESI+     | 162.07 | 0.81                | 1.75%     | 1.8           | 0.0149  | Lysine biosynthesis;Lysine degradation                                                                  |
| Nε,Nε,Nε-Trimethyl-lysine | ESI+     | 189.15 | 0.66                | 6.11%     | 2.4           | 0.0080  | Lysine degradation                                                                                      |
| Phenylacetyl-L-glutamine  | ESI+     | 265.11 | 3.48                | 2.47%     | 0.5           | 0.0480  | Phenylalanine metabolism                                                                                |
| SAM                       | ESI+     | 399.14 | 0.64                | 17.2%     | 6.8           | <0.0001 | Cysteine and methionine metabolism;<br>Arginine and proline metabolism                                  |
| Trigonelline              | ESI+     | 138.04 | 0.82                | 2.33%     | 1.2           | 0.0199  | Nicotinate and nicotinamide metabolism                                                                  |
| Tryptophan                | ESI+     | 205.09 | 2.46                | 3.85%     | 1.2           | 0.0324  | Tryptophan Metabolism                                                                                   |
| UDP-GlcNAc                | ESI+     | 608.09 | 0.8                 | 4.73%     | 4.9           | 0.0004  | Amino sugar and nucleotide sugar metabolism                                                             |
| uric acid                 | ESI+     | 169.03 | 0.79                | 3.09%     | 0.8           | 0.0094  | Purine metabolism                                                                                       |
| uridine                   | ESI+     | 245.07 | 0.85                | 8.14%     | 1.5           | 0.0000  | Pyrimidine metabolism                                                                                   |
| CDCA                      | ESI-     | 391.28 | 18.5                | 11.4%     | 0.7           | 0.0042  | Primary bile acid biosynthesis                                                                          |
| DHEA sulfate              | ESI-     | 367.15 | 14.4                | 4.66%     | 0.7           | 0.0264  | Steroid hormone biosynthesis                                                                            |

|                         |      |          |       |       |      |        |                                                                                                                                               |
|-------------------------|------|----------|-------|-------|------|--------|-----------------------------------------------------------------------------------------------------------------------------------------------|
| D-Pantothenic acid      | ESI- | 218.10   | 2.51  | 4.63% | 1.6  | 0.0014 | Pantothenate and CoA biosynthesis;<br>beta-Alanine metabolism                                                                                 |
| Etiocholanolone sulfate | ESI- | 369.17   | 15.8  | 5.50% | 0.7  | 0.0160 | Steroid hormone biosynthesis                                                                                                                  |
| Fumaric acid            | ESI- | 115.00   | 0.83  | 6.13% | 1.7  | 0.0049 | Nicotinate and nicotinamide<br>metabolism;<br>Alanine,aspartate and glutamate<br>metabolism;<br>Phenylalanine metabolism                      |
| GCDCA                   | ESI- | 448.30   | 18.1  | 4.21% | 1.4  | 0.0264 | Primary bile acid biosynthesis                                                                                                                |
| Glycerol 3-phosphate    | ESI- | 171.00   | 0.84  | 1.65% | 3.0  | 0.0005 | Glycerophospholipid metabolism;<br>Glycerolipid metabolism                                                                                    |
| Sphingosine             | ESI+ | 300.29   | 13.34 | 2.43% | 2.6  | 0.0007 | Sphingolipid metabolism                                                                                                                       |
| Lactic acid             | ESI- | 89.02    | 0.95  | 1.60% | 1.3  | 0.0102 | Pyruvate metabolism; TCA cycle;<br>Propanoate metabolism                                                                                      |
| L-Saccharopine          | ESI- | 275.12   | 0.88  | 4.39% | 3.0  | 0.0007 | Lysine biosynthesis; Lysine<br>degradation                                                                                                    |
| GlcNAc-6-P              | ESI- | 300.04   | 0.86  | 2.32% | 2.1  | 0.0247 | Amino sugar and nucleotide sugar<br>metabolism                                                                                                |
| N-Acetylglutamic acid   | ESI- | 188.05   | 0.85  | 3.38% | 0.4  | 0.0021 |                                                                                                                                               |
| N-Acetylaspartic acid   | ESI- | 174.04   | 0.85  | 3.42% | 2.0  | 0.0016 | Alanine,aspartate and glutamate<br>metabolism                                                                                                 |
| NAD                     | ESI- | 662.10   | 3.02  | 57.3% | 27.3 | 0.0019 | Nicotinate and nicotinamide<br>metabolism                                                                                                     |
| NADP                    | ESI- | 744.08   | 1.12  | 8.66% | 5.1  | 0.0029 | Nicotinate and nicotinamide<br>metabolism                                                                                                     |
| Nonanoic acid           | ESI- | 157.12   | 14.0  | 3.21% | 1.3  | 0.0199 |                                                                                                                                               |
| O-succinylhomoserine    | ESI- | 218.06   | 0.88  | 6.38% | 1.7  | 0.0422 | Cysteine and methionine metabolism;<br>Sulfur metabolism                                                                                      |
| p-Cresol sulfate        | ESI- | 187.00   | 7.10  | 3.55% | 0.8  | 0.0396 |                                                                                                                                               |
| SAH                     | ESI- | 383.11   | 4.53  | 2.02% | 1.4  | 0.0005 | Cysteine and methionine metabolism                                                                                                            |
| Succinic acid           | ESI- | 117.02   | 0.84  | 3.26% | 2.2  | 0.0214 | Alanine,aspartate and glutamate<br>metabolism;<br>(TCA cycle); Phenylalanine<br>metabolism;<br>Propanoate metabolism; Butanoate<br>metabolism |
| UDP-glucose             | ESI- | 565.04   | 0.89  | 9.30% | 3.0  | 0.0214 | Glycerolipid metabolism;<br>Amino sugar and nucleotide sugar<br>metabolism,<br>Starch and sucrose metabolism                                  |
| carnitine               | ESI+ | 162.1128 | 0.72  | 3.65% | 2.0  | 0.0025 | Lysine biosynthesis; Lysine<br>degradation; Fatty acid $\beta$ -oxidation                                                                     |
| carnitine C10:0         | ESI+ | 316.2468 | 10.1  | 4.47% | 0.3  | 0.0005 | Fatty acid $\beta$ -oxidation                                                                                                                 |
| carnitine C14:1         | ESI+ | 370.2951 | 12.8  | 5.22% | 0.6  | 0.0032 | Fatty acid $\beta$ -oxidation                                                                                                                 |
| carnitine C14:2         | ESI+ | 368.2801 | 11.9  | 2.46% | 0.3  | 0.0004 | Fatty acid $\beta$ -oxidation                                                                                                                 |
| carnitine C16:1         | ESI+ | 398.3277 | 14.1  | 8.77% | 0.8  | 0.0283 | Fatty acid $\beta$ -oxidation                                                                                                                 |
| carnitine C16:2         | ESI+ | 396.3094 | 13.3  | 6.01% | 0.4  | 0.0004 | Fatty acid $\beta$ -oxidation                                                                                                                 |
| carnitine C18:0         | ESI+ | 428.375  | 16.3  | 4.01% | 3.0  | 0.0068 | Fatty acid $\beta$ -oxidation                                                                                                                 |
| carnitine C4:0-OH       | ESI+ | 248.1489 | 0.86  | 10.7% | 1.9  | 0.0006 | Fatty acid $\beta$ -oxidation                                                                                                                 |

|                   |      |          |      |       |     |         |                               |
|-------------------|------|----------|------|-------|-----|---------|-------------------------------|
| carnitine C5:0-OH | ESI+ | 262.1651 | 0.87 | 16.1% | 4.7 | 0.0013  | Fatty acid $\beta$ -oxidation |
| carnitine C6:0    | ESI+ | 260.186  | 5.09 | 3.86% | 0.7 | 0.0019  | Fatty acid $\beta$ -oxidation |
| carnitine C6:0-OH | ESI+ | 276.1818 | 2.70 | 2.72% | 4.0 | 0.0002  | Fatty acid $\beta$ -oxidation |
| carnitine C8:0    | ESI+ | 288.2169 | 7.92 | 2.73% | 0.3 | <0.0001 | Fatty acid $\beta$ -oxidation |
| carnitine C8:1    | ESI+ | 286.2017 | 6.62 | 1.73% | 0.6 | <0.0001 | Fatty acid $\beta$ -oxidation |

---

**Table S3. Significantly altered genes in cysteine and methionine metabolism, NAD metabolism, hexosamine pathway, lysine degradation and fatty acid  $\beta$ -oxidation.**

| <i>Genes</i>   | <i>p</i> | PCT/ANT ratio | Protein                                       | Metabolic pathway                  | Target microRNA                                                                                                             |
|----------------|----------|---------------|-----------------------------------------------|------------------------------------|-----------------------------------------------------------------------------------------------------------------------------|
| <i>DNMT3A</i>  | 0.0299   | 1.3           | DNA (cytosine-5-)-methyltransferase 3 alpha   | Cysteine and methionine metabolism | hsa-miR-29c-3p $\uparrow$ ,<br>hsa-miR-143-3p $\downarrow$<br>hsa-miR-152 $\downarrow$ ,                                    |
| <i>DNMT1</i>   | 0.0455   | 1.2           | DNA (cytosine-5-)-methyltransferase 1         | Cysteine and methionine metabolism | hsa-miR-26a-5p $\downarrow$ ,<br>hsa-miR-148a-3p $\uparrow$ ,<br>hsa-miR-100-5p $\downarrow$<br>hsa-miR-29c-3p $\uparrow$ , |
| <i>DNMT3B</i>  | 0.0004   | 1.7           | DNA (cytosine-5-)-methyltransferase 3 beta    | Cysteine and methionine metabolism | hsa-miR-375 $\uparrow$ ,<br>hsa-miR-148a-3p $\uparrow$ ,<br>hsa-miR-93-5p $\uparrow$                                        |
| <i>AHCY</i>    | 0.0011   | 1.8           | Adenosylhomocysteinase                        | Cysteine and methionine metabolism | hsa-miR-26a-5p $\downarrow$                                                                                                 |
| <i>CBS</i>     | <0.0001  | 3.3           | Cystathionine-beta-synthase                   | Cysteine and methionine metabolism | hsa-miR-615-3p $\uparrow$ ,<br>hsa-miR-106b-3p $\uparrow$                                                                   |
| <i>GNMT</i>    | 0.0006   | 6.4           | Glycine N-methyltransferase                   | Cysteine and methionine metabolism | hsa-miR-100-5p $\downarrow$                                                                                                 |
| <i>PNP</i>     | 0.0129   | 1.8           | Purine nucleoside phosphorylase               | Cysteine and methionine metabolism | hsa-miR-1 $\downarrow$                                                                                                      |
| <i>CHDH</i>    | 0.0222   | 1.6           | Choline dehydrogenase                         | Cysteine and methionine metabolism |                                                                                                                             |
| <i>ALDH7A1</i> | 0.0017   | 1.9           | Aldehyde dehydrogenase 7 family, member A1    | Cysteine and methionine metabolism | hsa-let-7a-5p $\uparrow$                                                                                                    |
| <i>BHMT2</i>   | 0.0003   | 0.5           | Betaine-homocysteine S-methyltransferase 2    | Cysteine and methionine metabolism |                                                                                                                             |
| <i>NAMPT</i>   | 0.0240   | 1.9           | Nicotinamide phosphoribosyltransferase        | NAD metabolism                     |                                                                                                                             |
| <i>NADK2</i>   | 0.0004   | 1.6           | NAD kinase 2, mitochondrial                   | NAD metabolism                     |                                                                                                                             |
| <i>HK2</i>     | 0.0012   | 1.9           | Hexokinase 2                                  | Hexosamine pathway                 | hsa-miR-143-3p $\downarrow$                                                                                                 |
| <i>GFPT1</i>   | 0.0002   | 2.0           | Glutamine-fructose-6-phosphate transaminase 1 | Hexosamine pathway                 |                                                                                                                             |
| <i>GNPNAT1</i> | 0.0001   | 2.3           | Glucosamine-phosphate N-acetyltransferase 1   | Hexosamine pathway                 | hsa-miR-1 $\downarrow$                                                                                                      |
| <i>PGM3</i>    | 0.0177   | 1.6           | Phosphoglucomutase 3                          | Hexosamine pathway                 | hsa-miR-125a-5p $\downarrow$ ,<br>hsa-miR-455-3p $\downarrow$                                                               |
| <i>UAP1</i>    | <0.0001  | 3.4           | UDP-N-acetylglucosamine pyrophosphorylase 1   | Hexosamine pathway                 |                                                                                                                             |
| <i>OGT</i>     | 0.0039   | 1.5           | O-linked N-acetylglucosamine transferase      | Hexosamine pathway                 | hsa-miR-26a-5p $\downarrow$ ,<br>hsa-miR-125a-5p $\downarrow$<br>hsa-let-7d-5p $\downarrow$ ,                               |
| <i>AASS</i>    | 0.0014   | 1.4           | Amino adipate-semialdehyde synthase           | Lysine degradation                 | hsa-miR-944 $\downarrow$ ,<br>hsa-miR-7-1-3p $\uparrow$ ,<br>hsa-let-7e-5p $\downarrow$                                     |
| <i>AASDH</i>   | 0.0015   | 1.5           | Amino adipate-semialdehyde dehydrogenase      | Lysine degradation                 |                                                                                                                             |
| <i>AADAT</i>   | 0.0018   | 2.1           | Amino adipate aminotransferase                | Lysine degradation                 |                                                                                                                             |
| <i>TMLHE</i>   | 0.0072   | 0.7           | Trimethyllysine hydroxylase, epsilon          | Lysine degradation                 |                                                                                                                             |
| <i>ACAD8</i>   | 0.0002   | 2.9           | Acyl-CoA dehydrogenase family, member 8       | Fatty acid $\beta$ -oxidation      | hsa-let-7a-5p $\uparrow$                                                                                                    |
| <i>ACAD9</i>   | 0.0101   | 1.5           | Acyl-CoA dehydrogenase family, member 9       | Fatty acid $\beta$ -oxidation      |                                                                                                                             |
| <i>ACAD10</i>  | 0.0455   | 1.3           | Acyl-CoA dehydrogenase family, member 10      | Fatty acid $\beta$ -oxidation      |                                                                                                                             |
| <i>ACADSB</i>  | 0.0032   | 1.8           | Acyl-CoA dehydrogenase, short/branched chain  | Fatty acid $\beta$ -oxidation      |                                                                                                                             |
| <i>CPT2</i>    | 0.0101   | 1.5           | Carnitine palmitoyltransferase 2              | Fatty acid $\beta$ -oxidation      | hsa-miR-378a-3p $\downarrow$                                                                                                |
| <i>CPT1A</i>   | 0.0093   | 1.6           | Carnitine palmitoyltransferase 1A             | Fatty acid $\beta$ -oxidation      |                                                                                                                             |
| <i>CPT1C</i>   | 0.0039   | 0.6           | Carnitine palmitoyltransferase 1C             | Fatty acid $\beta$ -oxidation      | hsa-miR-615-3p $\downarrow$                                                                                                 |
| <i>ACAT1</i>   | 0.0015   | 2.2           | Acetyl-CoA acetyltransferase 1                | Fatty acid $\beta$ -oxidation      | hsa-miR-23b-3p $\downarrow$                                                                                                 |

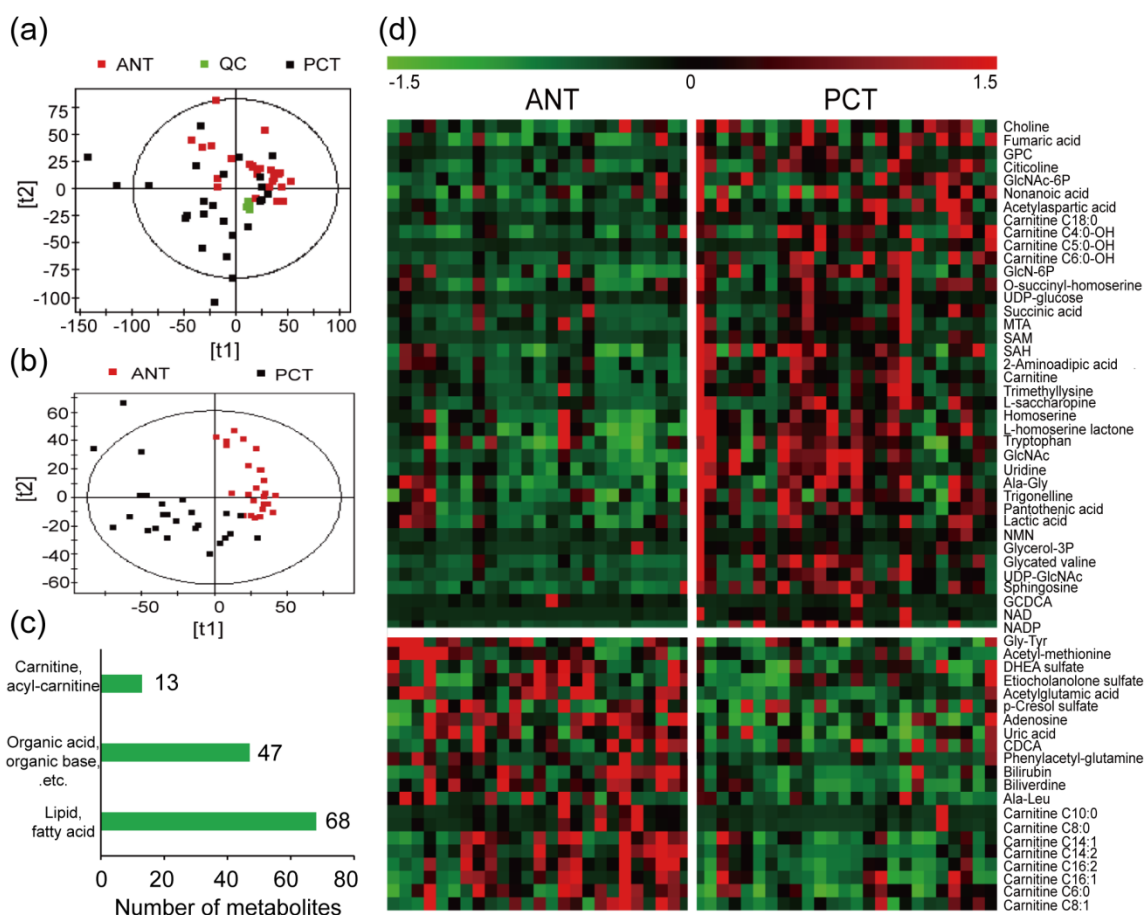

**Figure S1. Multivariate statistical analysis and differential metabolites of prostate cancer tissue and noncancerous tissue.** (a) Score scatter plot of PCA model. R2X=0.272, Q2=0.154. (b) Score scatter plot of PLS-DA model. R2X=0.237, R2Y=0.768, Q2=0.567. (c) Distribution of all of differential metabolites in various kinds of compounds. (d) Relative level of differential metabolites in PCT and ANT. PCT: Prostate cancer tissue, ANT: Adjacent noncancerous tissue.

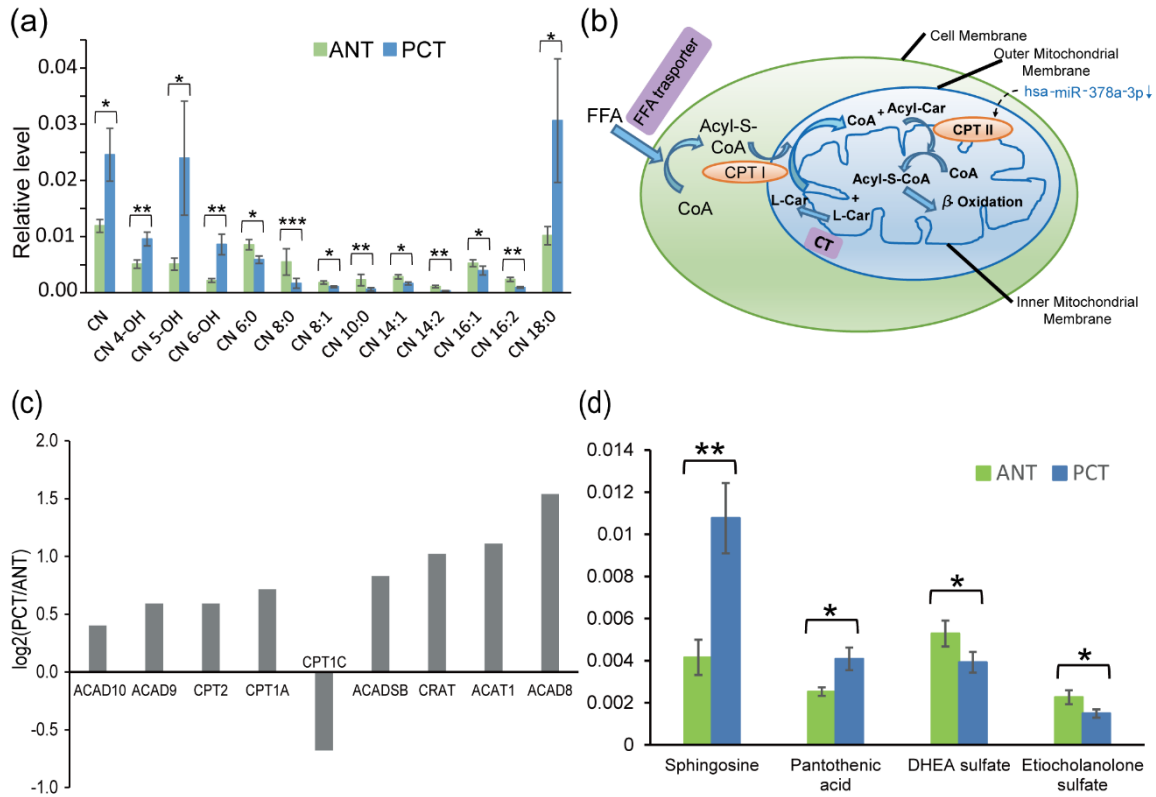

**Figure S2. Molecular alterations in prostate cancer.** (a) Relative levels of carnitine and acylcarnitine in PCT and ANT. \*: a significant difference,  $0.001 < p < 0.05$ , \*\*:  $0.0001 < p < 0.001$ , \*\*\*:  $p < 0.0001$ . (b) The important role of acylcarnitine in fatty acid  $\beta$ -oxidation. (c) The alteration of genes associated with fatty acid  $\beta$ -oxidation. (d) Relative levels of sphingosine, pantothenic acid, DHEA sulfate and etiocholanolone sulfate in PCT versus ANT.
